# Supplementary material for: Artificial Neural Networks for Predicting the Diameter of Electrospun Nanofibers Synthesized from Solutions/Emulsions of Biopolymers and Oils
Source: MDPI journal article supplement (doi:10.3390/ma16165720), 2023-08-21
Supplement: s1 [file s1]

## Supplementary Materials

**Table S1.** Operation parameters and physical properties of the polymeric solutions/emulsions prior to the electrospinning process and experimental nanofiber diameter.

| Solutions/emulsions<br>%(w/w) | Flow<br>rate<br>(mL/h) | Voltage<br>(kV) | Viscosity<br>(Pa·s) | Conductivity<br>(mS/cm) | Experimental<br>nanofiber<br>diameter<br>(nm) |
|-------------------------------|------------------------|-----------------|---------------------|-------------------------|-----------------------------------------------|
| PVA 10%                       | 0.1                    | 24              | 0.43                | 0.49                    | 310.97 ±57.85                                 |
|                               |                        |                 |                     |                         | 298.40 ±42.85                                 |
|                               |                        |                 |                     |                         | 317.34 ±42.61                                 |
|                               |                        |                 |                     |                         | 331.01 ±65.34                                 |
| PVA 8%                        |                        |                 | 0.28                | 0.58                    | 178.59 ±22.84                                 |
|                               |                        |                 |                     |                         | 171.75 ±23.77                                 |
|                               |                        |                 |                     |                         | 172.77 ±31.90                                 |
|                               |                        |                 |                     |                         | 174.32 ±30.53                                 |
| PVA 10%/OO 4%                 |                        |                 | 0.39                | 0.55                    | 207.69 ±45.28                                 |
|                               |                        |                 |                     |                         | 217.45 ±72.55                                 |
|                               |                        |                 |                     |                         | 209.60 ±57.19                                 |
|                               |                        |                 |                     |                         | 232.37 ±46.93                                 |
| PVA 10%/OO 8%                 |                        |                 | 0.43                | 0.52                    | 289.76 ±51.20                                 |
|                               |                        |                 |                     |                         | 285.31 ±29.22                                 |
|                               |                        |                 |                     |                         | 297.87 ±70.49                                 |
|                               |                        |                 |                     |                         | 284.83 ±59.10                                 |
| PVA 10%                       | 1.8                    |                 | 0.55                | 0.48                    | 289.82 ±63.14                                 |
|                               |                        |                 |                     |                         | 307.47 ±69.57                                 |
|                               |                        |                 |                     |                         | 305.36 ±60.22                                 |
|                               |                        |                 |                     |                         | 287.65 ±39.35                                 |
| PVA 10%/OEO 5%                | 0.6                    |                 | 0.63                | 0.45                    | 270.18 ±56.21                                 |
|                               |                        |                 |                     |                         | 266.49 ±69.46                                 |
|                               |                        |                 |                     |                         | 270.03 ±36.70                                 |
|                               |                        |                 |                     |                         | 288.85 ±44.90                                 |
| PVA 10%/OEO 7.5%              | 1.2                    |                 | 0.72                | 0.43                    | 300.51 ±55.93                                 |
|                               |                        |                 |                     |                         | 266.92 ±45.22                                 |
|                               |                        |                 |                     |                         | 270.63 ±38.41                                 |
|                               |                        |                 |                     |                         | 256.41 ±34.55                                 |
| PVA 10%/OEO 10%               | 1.8                    |                 | 0.76                | 0.43                    | 343.61 ±61.47                                 |
|                               |                        |                 |                     |                         | 327.47 ±68.58                                 |
|                               |                        |                 |                     |                         | 352.01 ±51.61                                 |

|                     |      |      |               |      |               |
|---------------------|------|------|---------------|------|---------------|
|                     |      |      |               |      | 315.72 ±67.04 |
| GT 18%/ α -TOC 5%   | 0.02 | 30   | 0.28          | 2.63 | 247.81 ±51.28 |
|                     |      |      |               |      | 266.49 ±45.02 |
|                     |      |      |               |      | 237.26 ±53.50 |
|                     |      |      |               |      | 260.24 ±59.68 |
| GT 20%/ α -TOC 5%   |      |      | 0.45          | 2.73 | 194.94 ±34.10 |
|                     |      |      |               |      | 229.70 ±32.89 |
|                     |      |      |               |      | 222.82 ±25.30 |
|                     |      |      |               |      | 220.76 ±30.64 |
| GT 22%/ α -TOC 5%   |      |      | 0.51          | 2.89 | 239.98 ±46.10 |
|                     |      |      |               |      | 203.85 ±33.23 |
|                     |      |      |               |      | 191.33 ±31.29 |
|                     |      |      |               |      | 188.60 ±30.88 |
| GT 22%/ α -TOC 7.5% |      |      | 0.54          | 1.99 | 173.29 ±28.02 |
|                     |      |      |               |      | 169.90 ±25.86 |
|                     |      |      |               |      | 175.36 ±22.92 |
|                     |      |      |               |      | 175.37 ±20.37 |
| GT 22%/ α -TOC 10%  | 0.60 | 1.88 | 223.28 ±51.35 |      |               |
|                     |      |      | 202.68 ±31.80 |      |               |
|                     |      |      | 208.91 ±44.72 |      |               |
|                     |      |      | 195.11 ±43.10 |      |               |
| PVA 10%/CS 0.5%     | 0.1  | 26   | 0.23          | 0.50 | 279.18 ±41.62 |
|                     |      |      |               |      | 257.83 ±60.38 |
|                     |      |      |               |      | 260.81 ±42.58 |
|                     |      |      |               |      | 263.34 ±44.75 |
| PVA 10%/CS 2%       |      |      | 0.25          | 0.59 | 209.32 ±51.89 |
|                     |      |      |               |      | 249.06 ±56.02 |
|                     |      |      |               |      | 249.02 ±57.22 |
|                     |      |      |               |      | 241.35 ±41.19 |
| PVA 10%/CS 1%       | 0.14 | 21   | 0.20          | 1.16 | 275.18 ±46.51 |
|                     |      |      |               |      | 257.65 ±51.03 |
|                     |      |      |               |      | 267.98 ±48.90 |
|                     |      |      |               |      | 261.79 ±41.89 |
| PVA 8%/CS 1.5%      | 0.1  | 26   | 0.40          | 1.27 | 268.95 ±36.30 |
|                     |      |      |               |      | 246.61 ±44.48 |
|                     |      |      |               |      | 242.36 ±35.06 |
|                     |      |      |               |      | 241.50 ±26.38 |
| PVA 10%/AO 22%      | 0.6  | 24   | 0.32          | 0.47 | 103.49 ±19.28 |
|                     |      |      |               |      | 102.68 ±12.79 |
|                     |      |      |               |      | 93.52 ±15.87  |
|                     |      |      |               |      | 103.96 ±17.85 |

|                       |   |    |      |      |               |
|-----------------------|---|----|------|------|---------------|
| <b>PVA 10%/Av 55%</b> | 1 | 24 | 0.08 | 1.77 | 103.51 ±13.74 |
|                       |   |    |      |      | 103.53 ±14.08 |
|                       |   |    |      |      | 96.05 ±16.68  |
|                       |   |    |      |      | 107.58 ±18.15 |

**Table S2.** Normalized Data.

| <b>Solutions/emulsions<br/>%(w/w)</b> | <b>Flow<br/>(mL/h)</b> | <b>Voltage<br/>(kV)</b> | <b>Viscosity<br/>(Pa·s)</b> | <b>Conductivity<br/>(mS/cm)</b> | <b>Experimental<br/>nanofiber<br/>diameter<br/>(nm)</b> |
|---------------------------------------|------------------------|-------------------------|-----------------------------|---------------------------------|---------------------------------------------------------|
| <b>PVA 10%</b>                        | -0.54                  | -0.63                   | 0.04                        | -0.76                           | 1.20                                                    |
|                                       |                        |                         |                             |                                 | 1.01                                                    |
|                                       |                        |                         |                             |                                 | 1.30                                                    |
|                                       |                        |                         |                             |                                 | 1.52                                                    |
| <b>PVA 8%</b>                         | -0.54                  | -0.63                   | -0.80                       | -0.66                           | -0.88                                                   |
|                                       |                        |                         |                             |                                 | -0.98                                                   |
|                                       |                        |                         |                             |                                 | -0.97                                                   |
|                                       |                        |                         |                             |                                 | -0.94                                                   |
| <b>PVA 10%/OO 4%</b>                  | -0.54                  | -0.63                   | -0.18                       | -0.69                           | -0.42                                                   |
|                                       |                        |                         |                             |                                 | -0.27                                                   |
|                                       |                        |                         |                             |                                 | -0.39                                                   |
|                                       |                        |                         |                             |                                 | -0.03                                                   |
| <b>PVA 10% /OO 8%</b>                 | -0.54                  | -0.63                   | 0.04                        | -0.73                           | 0.87                                                    |
|                                       |                        |                         |                             |                                 | 0.80                                                    |
|                                       |                        |                         |                             |                                 | 1.00                                                    |
|                                       |                        |                         |                             |                                 | 0.79                                                    |
| <b>PVA 10%</b>                        | 2.36                   | -0.63                   | 0.73                        | -0.77                           | 0.87                                                    |
|                                       |                        |                         |                             |                                 | 1.15                                                    |
|                                       |                        |                         |                             |                                 | 1.11                                                    |
|                                       |                        |                         |                             |                                 | 0.84                                                    |
| <b>PVA 10%/OEO 5%</b>                 | 0.31                   | -0.63                   | 1.15                        | -0.81                           | 0.56                                                    |
|                                       |                        |                         |                             |                                 | 0.50                                                    |
|                                       |                        |                         |                             |                                 | 0.56                                                    |
|                                       |                        |                         |                             |                                 | 0.86                                                    |
| <b>PVA 10%/OEO 7.5%</b>               | 1.34                   | -0.63                   | 1.64                        | -0.83                           | 1.04                                                    |
|                                       |                        |                         |                             |                                 | 0.51                                                    |
|                                       |                        |                         |                             |                                 | 0.57                                                    |
|                                       |                        |                         |                             |                                 | 0.35                                                    |
| <b>PVA 10%/OEO 10%</b>                | 2.36                   | -0.63                   | 1.87                        | -0.83                           | 1.72                                                    |
|                                       |                        |                         |                             |                                 | 1.46                                                    |
|                                       |                        |                         |                             |                                 | 1.85                                                    |

|                                              |       |       |       |       |       |
|----------------------------------------------|-------|-------|-------|-------|-------|
|                                              |       |       |       |       | 1.28  |
| <b>GT 18%/ <math>\alpha</math> -TOC 5%</b>   | -0.68 | 1.54  | -0.80 | 1.71  | 0.21  |
|                                              |       |       |       |       | 0.50  |
|                                              |       |       |       |       | 0.05  |
|                                              |       |       |       |       | 0.41  |
| <b>GT 20%/ <math>\alpha</math> -TOC 5%</b>   | -0.68 | 1.54  | 0.13  | 1.83  | -0.62 |
|                                              |       |       |       |       | -0.07 |
|                                              |       |       |       |       | -0.18 |
|                                              |       |       |       |       | -0.21 |
| <b>GT 22%/ <math>\alpha</math> -TOC 5%</b>   | -0.68 | 1.54  | 0.46  | 2.01  | 0.09  |
|                                              |       |       |       |       | -0.48 |
|                                              |       |       |       |       | -0.68 |
|                                              |       |       |       |       | -0.72 |
| <b>GT 22%/ <math>\alpha</math> -TOC 7.5%</b> | -0.68 | 1.54  | 0.65  | 0.97  | -0.96 |
|                                              |       |       |       |       | -1.01 |
|                                              |       |       |       |       | -0.93 |
|                                              |       |       |       |       | -0.93 |
| <b>GT 22%/ <math>\alpha</math> -TOC 10%</b>  | -0.68 | 1.54  | 1.00  | 0.85  | -0.17 |
|                                              |       |       |       |       | -0.50 |
|                                              |       |       |       |       | -0.40 |
|                                              |       |       |       |       | -0.62 |
| <b>PVA 10%/CS 0.5%</b>                       | -0.54 | 0.10  | -1.11 | -0.75 | 0.70  |
|                                              |       |       |       |       | 0.37  |
|                                              |       |       |       |       | 0.42  |
|                                              |       |       |       |       | 0.45  |
| <b>PVA 10%/CS 2%</b>                         | -0.54 | 0.10  | -0.95 | -0.64 | -0.39 |
|                                              |       |       |       |       | 0.23  |
|                                              |       |       |       |       | 0.23  |
|                                              |       |       |       |       | 0.11  |
| <b>PVA 10%/CS 1%</b>                         | -0.48 | -1.71 | -1.27 | 0.02  | 0.64  |
|                                              |       |       |       |       | 0.37  |
|                                              |       |       |       |       | 0.53  |
|                                              |       |       |       |       | 0.43  |
| <b>PVA 8%/CS 1.5%</b>                        | -0.54 | 0.10  | -0.13 | 0.14  | 0.54  |
|                                              |       |       |       |       | 0.19  |
|                                              |       |       |       |       | 0.13  |
|                                              |       |       |       |       | 0.11  |
| <b>PVA 10%/AO 22%</b>                        | 0.31  | -0.63 | -0.57 | -0.78 | -2.06 |
|                                              |       |       |       |       | -2.07 |
|                                              |       |       |       |       | -2.21 |
|                                              |       |       |       |       | -2.05 |

|                       |      |       |       |      |       |
|-----------------------|------|-------|-------|------|-------|
| <b>PVA 10%/Av 55%</b> | 1.00 | -0.63 | -1.91 | 0.72 | -2.06 |
|                       |      |       |       |      | -2.06 |
|                       |      |       |       |      | -2.17 |
|                       |      |       |       |      | -1.99 |

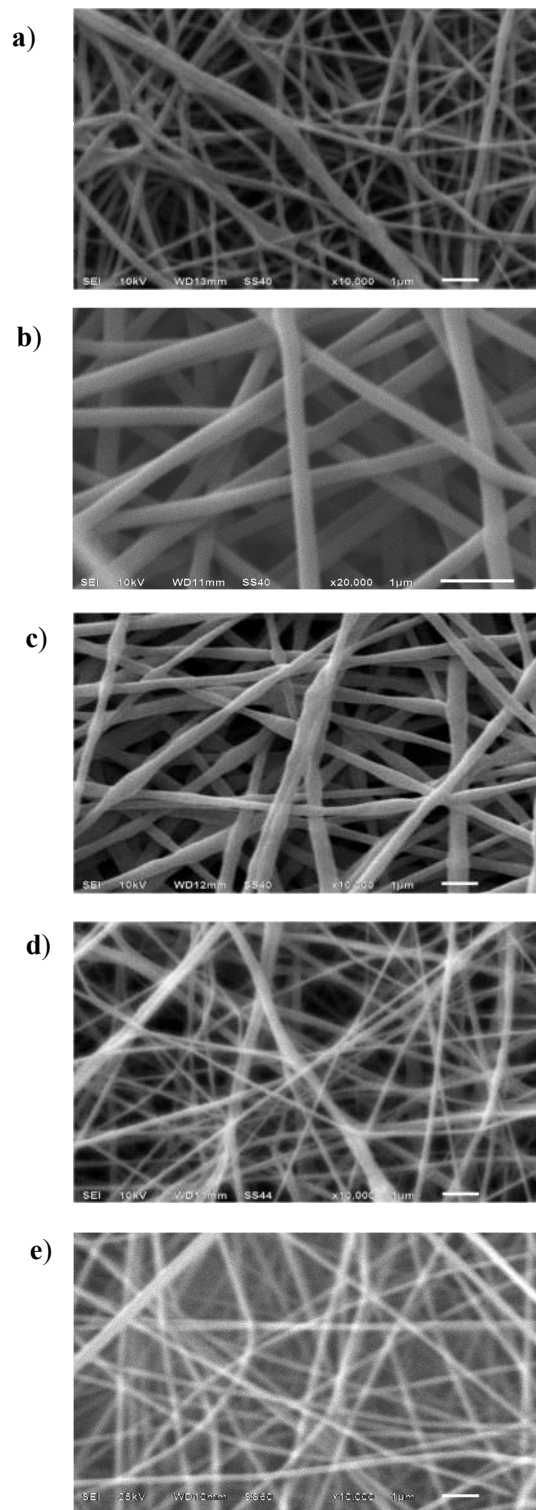

**Figure S1.** Micrographs of the studied systems: a) 8% PVA, b) 10% PVA, c) PVA/GO, d)GT/  $\alpha$  -TOC and e) PVA/CS.

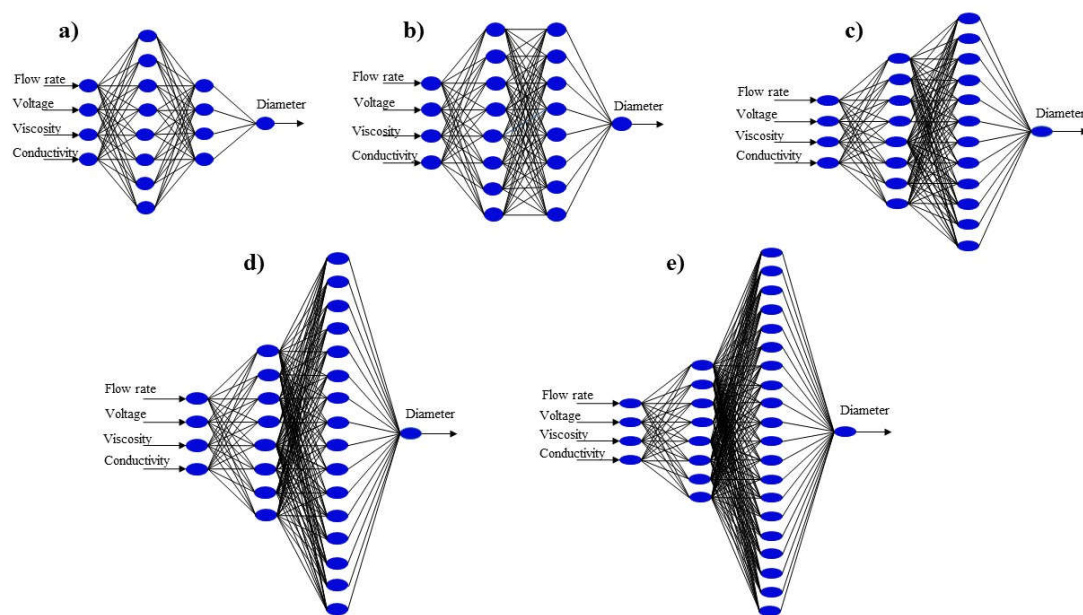

**Figure S2.** Configurations with two hidden layers.

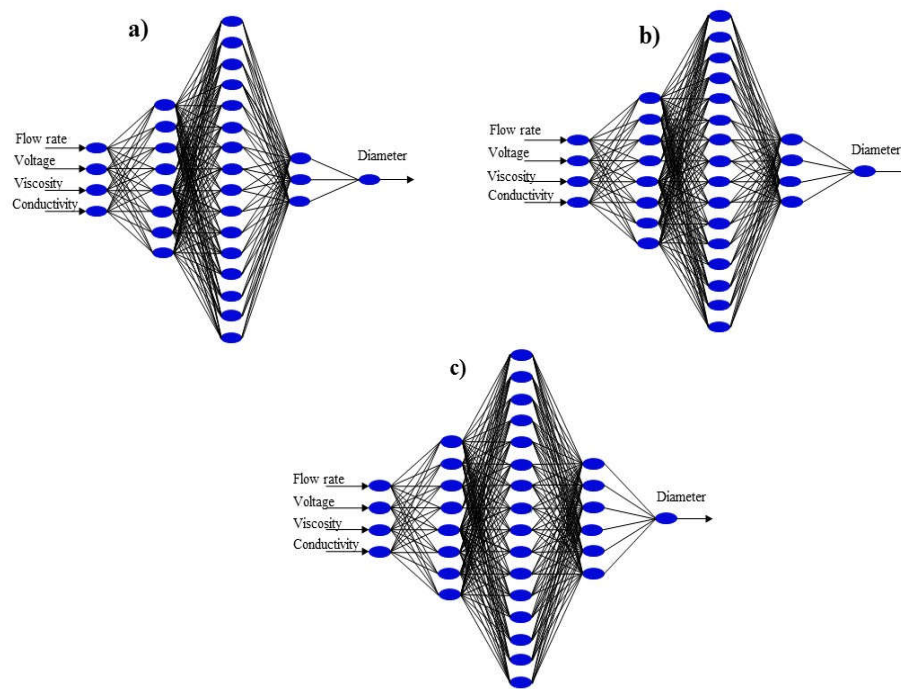

**Figure S3.** Configurations with three hidden layers.



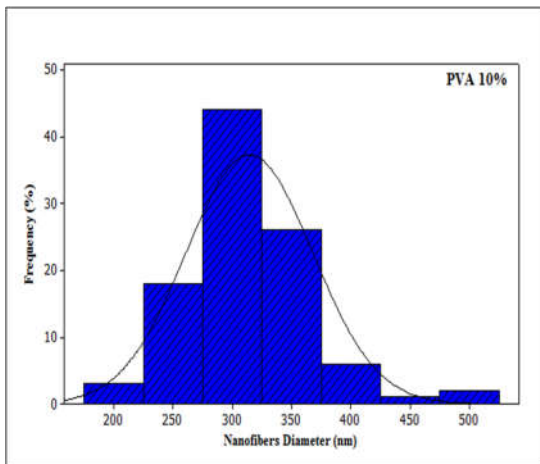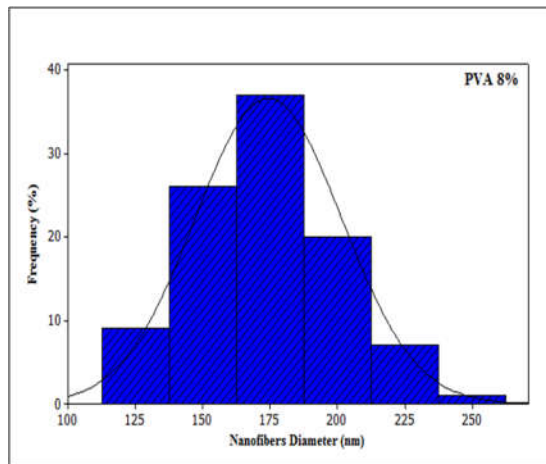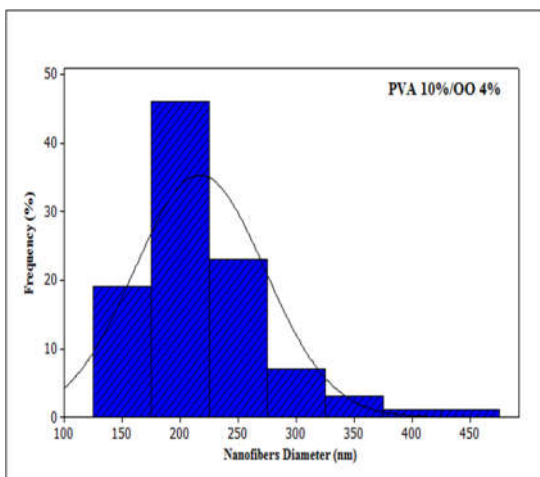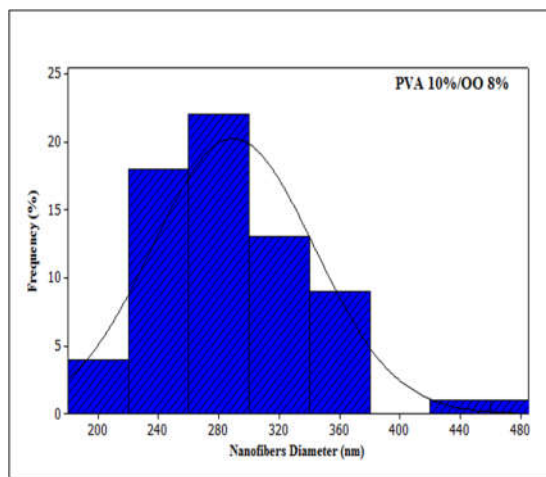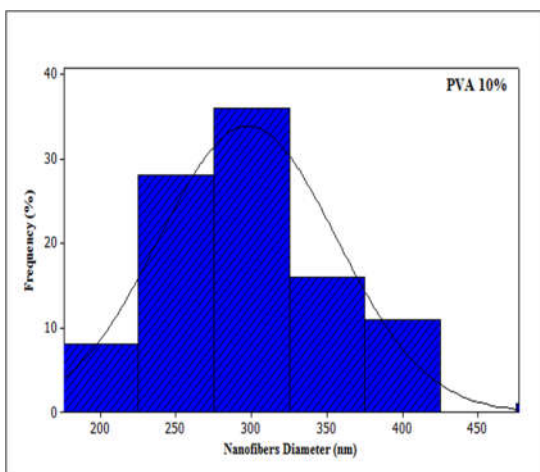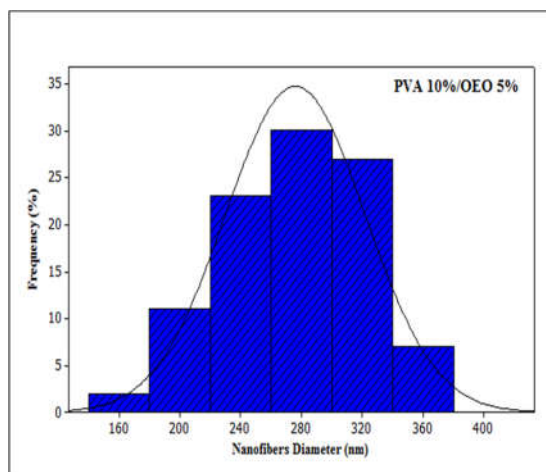

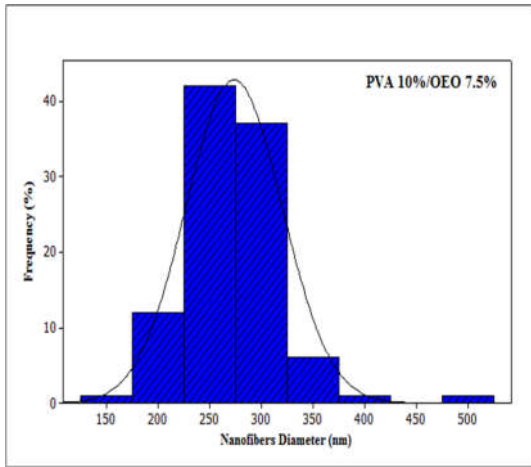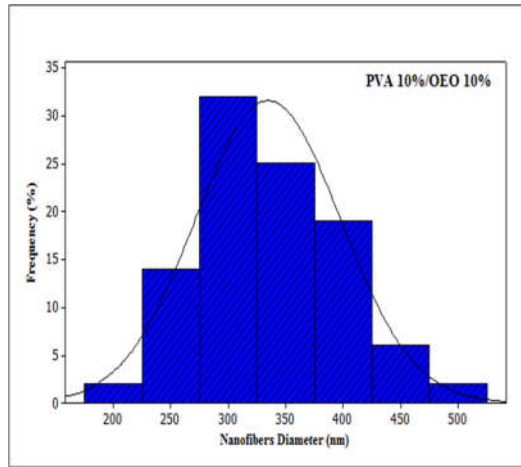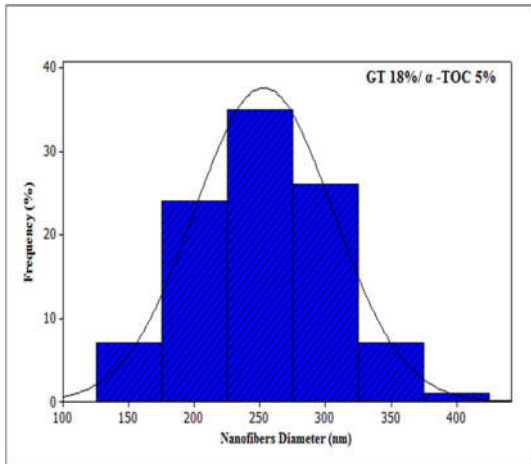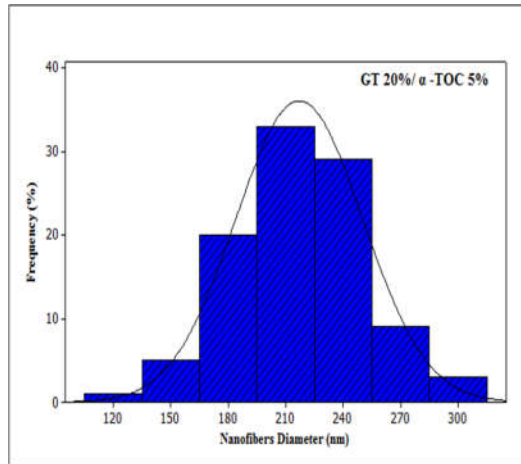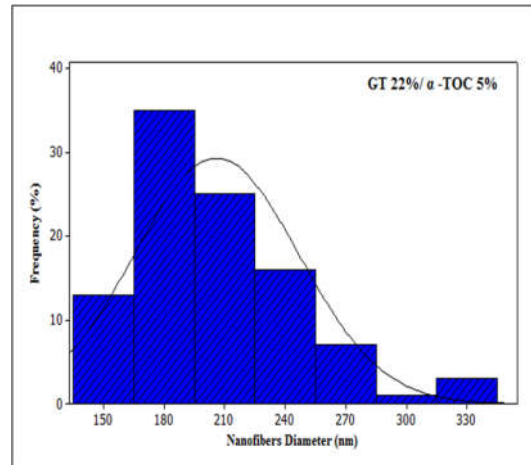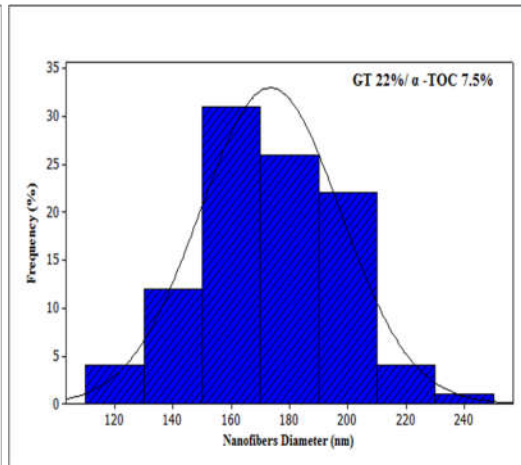

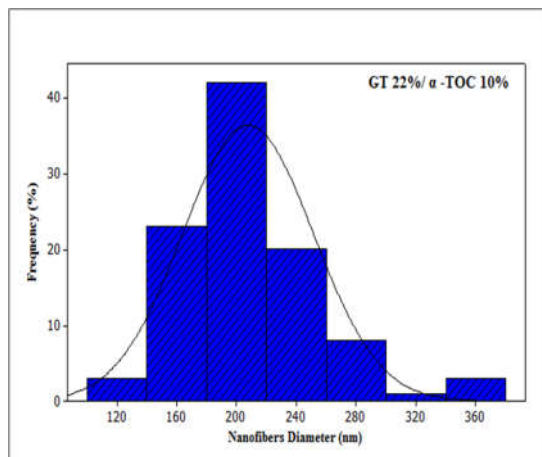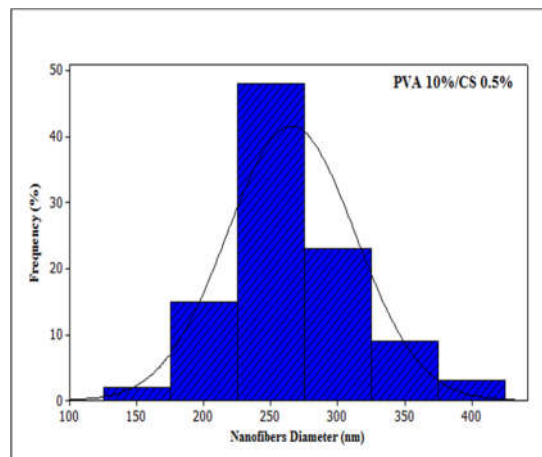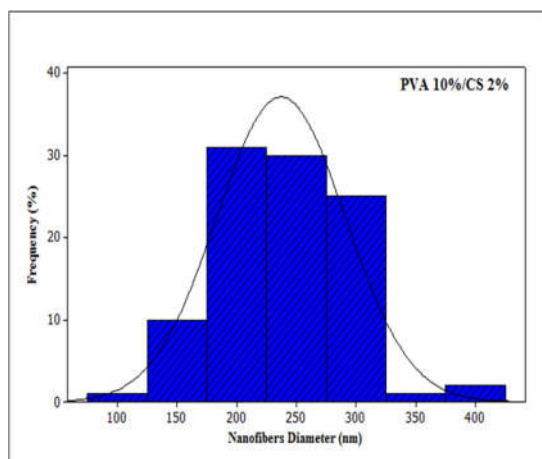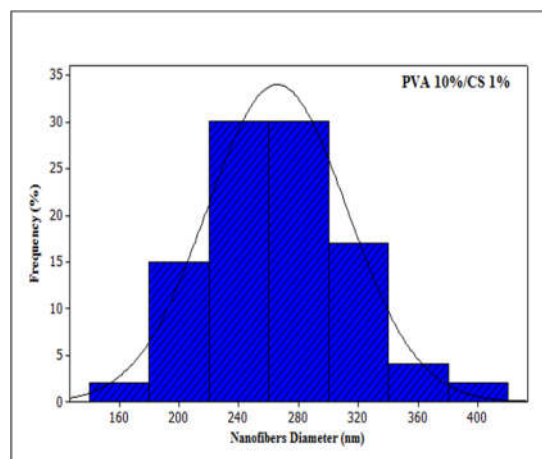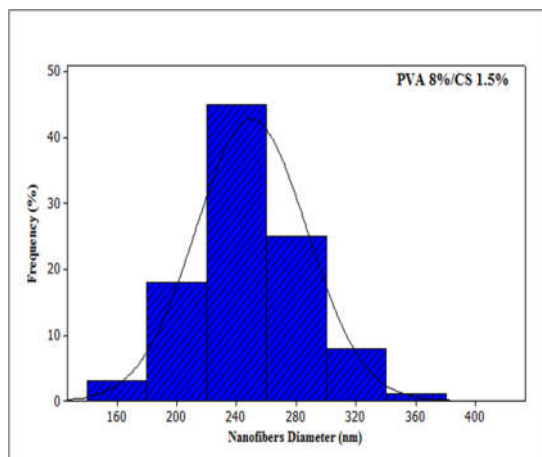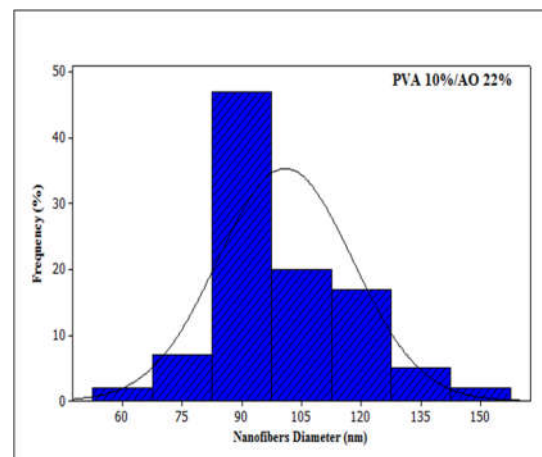

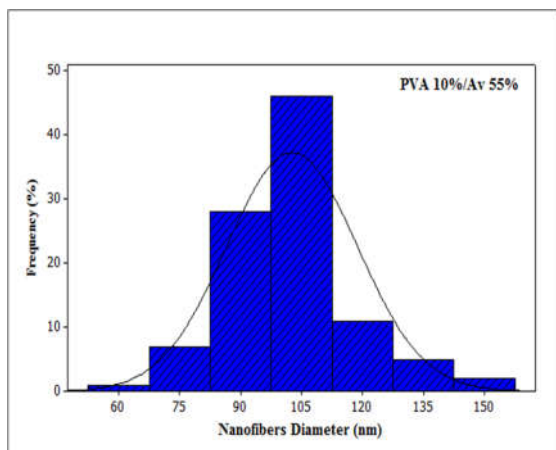

**Figure S4.** Diameter distribution of the electrospun nanofibers.
